# Supplementary material for: Microemulsion-based synthesis of V1−xWxO2@SiO2 core–shell structures for smart window applications
Source: Royal Society of Chemistry journal article supplement (doi:10.1039/c3tc32282c), 2014-01-01
Supplement: c3tc32282c1.pdf [file c3tc32282c1.pdf]

# Microemulsion-based synthesis of $V_{1-x}W_xO_2@SiO_2$ core-shell structures for smart window applications

*Yijie Zhou<sup>1</sup>, Shidong Ji<sup>1</sup>, Yamei Li<sup>1</sup>, Yanfeng Gao<sup>1,2\*</sup>, Hongjie Luo<sup>1,2</sup>, Ping Jin<sup>1\*</sup>*

- 1 State Key Laboratory of High Performance Ceramics and Superfine Microstructure, Shanghai institute of Ceramics, Chinese Academy of Sciences, Dingxi 1295, Changning, Shanghai, 200050, China
- 2 School of Materials Science and Engineering, Shanghai University, Shangda Rd. 99, Baoshan, Shanghai 200444, China

\* Author for correspondence. Email: [yfgao@mail.sic.ac.cn](mailto:yfgao@mail.sic.ac.cn), Tel/Fax: +86-21-5241-5270;  
Email: [p-jin@mail.sic.ac.cn](mailto:p-jin@mail.sic.ac.cn), Tel/Fax: +86-21-6990-6213

## Supporting Information

At the end part of this paper, there referred some of our latest results and one of them can be given as following:

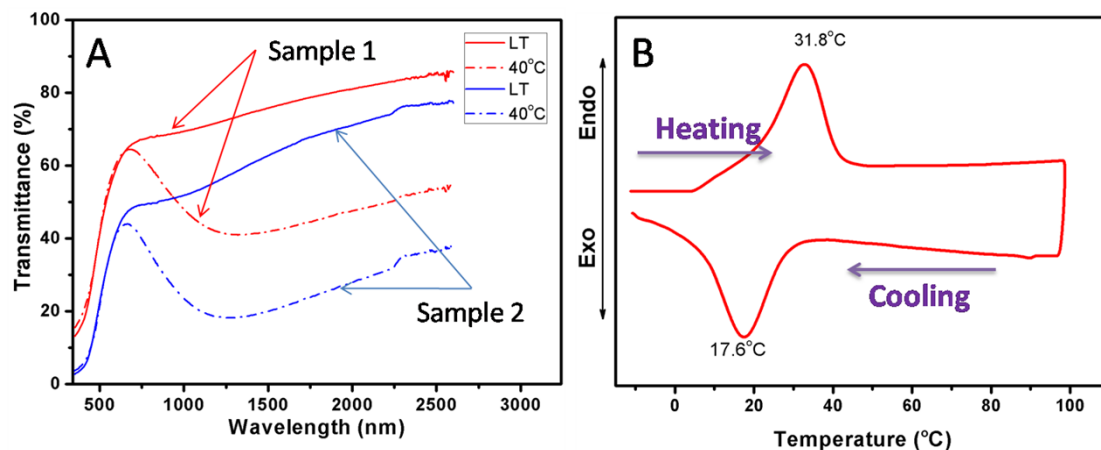

Figure S1(A) Optical transmittance spectra of our recent thermochromic foils;

(B) DSC curves corresponding to the Samples;

Sample 1, Sample 2 were prepared with the same thermochromic nanopowder;

LT indicates that the sample was first cooled in the refrigerator for 10 min before optical measurement;

40°C indicates the keep the temperature of measurement at 40 °C.

**Table S1 Phase transition temperature and optical parameters of Sample 1 and Sample 2**

| Sample | T <sub>c</sub> (°C) | T <sub>Lum</sub> (%) |                    | T <sub>Sol</sub> (%) |                    | ΔT <sub>2000nm</sub> | ΔT <sub>1500nm</sub> | ΔT <sub>Sol</sub> |
|--------|---------------------|----------------------|--------------------|----------------------|--------------------|----------------------|----------------------|-------------------|
|        |                     | T > T <sub>c</sub>   | T < T <sub>c</sub> | T > T <sub>c</sub>   | T < T <sub>c</sub> | (%)                  | (%)                  | (%)               |
| 1      | 31.8                | 52.57                | 53.79              | 49.21                | 59.35              | 33.5                 | 34.0                 | 10.14             |
| 2      | 31.8                | 34.05                | 34.36              | 28.19                | 42.73              | 43.0                 | 42.7                 | 14.38             |
